# Supplementary material
Source: PubMed Central journal article supplement (PMC6505844)
Supplement: DS1_JVDI_10.1177_1040638718793677.pdf [file DS1_JVDI_10.1177_1040638718793677.pdf]

**Supplementary Table 1.** AUC and density distribution of sub-fractions 1–11.

|         | Sub-fraction       |                   |                   |                      |                     |                     |                     |                         |                          |                         |                        | Total                         |
|---------|--------------------|-------------------|-------------------|----------------------|---------------------|---------------------|---------------------|-------------------------|--------------------------|-------------------------|------------------------|-------------------------------|
|         | 1                  | 2                 | 3                 | 4                    | 5                   | 6                   | 7                   | 8                       | 9                        | 10                      | 11                     |                               |
|         | 1.0102–<br>1.0187  | 1.0188–<br>1.0229 | 1.0230–<br>1.0272 | 1.0273–<br>1.0319    | 1.0320–<br>1.0373   | 1.0374–<br>1.0438   | 1.0440–<br>1.0524   | 1.0526–<br>1.0651       | 1.0654–<br>1.0852        | 1.0858–<br>1.1190       | 1.1199–<br>1.1781      |                               |
| Healthy | 216*<br>(42–1,369) | 96*<br>(41–735)   | 202*<br>(64–974)  | 407**<br>(140–1,220) | 601*<br>(218–3,696) | 531*<br>(247–1,251) | 660*<br>(315–4,441) | 1,139**<br>(691–2,045)  | 2,450*<br>(1,636–10,370) | 4,106*<br>(3,436–5,062) | 767**<br>(524–1,314)   | 11,943*<br>(8,361–<br>19,476) |
| EPI-T   | 152*<br>(5–621)    | 65*<br>(0.9–305)  | 128*<br>(3–579)   | 220***<br>(23–799)   | 316*<br>(32–1,155)  | 384*<br>(36–1,568)  | 463*<br>(56–1,711)  | 1,006***<br>(104–2,262) | 1,914*<br>(407–9,783)    | 3,491*<br>(1,668–5,107) | 1,022**<br>(453–2,145) | 9,355*<br>(2,919–<br>19,178)  |
| EPI-NT  | 62*<br>(32–138)    | 20*<br>(14–65)    | 32*<br>(9–143)    | 69***<br>(19–225)    | 106*<br>(29–230)    | 130*<br>(32–264)    | 147*<br>(36–370)    | 311***<br>(78–676)      | 1,070*<br>(278–1,909)    | 2,940*<br>(1,641–3,602) | 867<br>(588–1,152)     | 6,048*<br>(2,796–7,936)       |

AUC = area under the curve; EPI = exocrine pancreatic insufficiency; EPI-NT = EPI untreated; EPI-T = EPI treated with enzyme supplementation. Range in parentheses.

\* Significantly different between all 3 groups.

\*\* Significantly different between groups.

\*\*\* Significantly different between groups.

**Supplementary Table 2.** AUC% and density distribution from sub-fractions 1–11.

|         | Sub-fraction      |                    |                      |                    |                     |                     |                     |                      |                     |                        |                     |
|---------|-------------------|--------------------|----------------------|--------------------|---------------------|---------------------|---------------------|----------------------|---------------------|------------------------|---------------------|
|         | 1                 | 2                  | 3                    | 4                  | 5                   | 6                   | 7                   | 8                    | 9                   | 10                     | 11                  |
|         | 1.0102–<br>1.0187 | 1.0188–<br>1.0229  | 1.0230–<br>1.0272    | 1.0273–<br>1.0319  | 1.0320–<br>1.0373   | 1.0374–<br>1.0438   | 1.0440–<br>1.0524   | 1.0526–<br>1.0651    | 1.0654–<br>1.0852   | 1.0858–<br>1.1190      | 1.1199–<br>1.1781   |
| Healthy | 1.8<br>(0.4–8.3)  | 0.8**<br>(0.4–5.0) | 1.6**<br>(0.6–6.7)   | 3.2**<br>(1.2–8.1) | 4.8**<br>(1.4–21.7) | 4.3**<br>(1.3–8.3)  | 5.3**<br>(1.7–26.1) | 9.6**<br>(4.0–14.7)  | 21.3<br>(13.7–53.2) | 35.8**<br>(18.2–47.3)  | 6.7*<br>(2.7–13.2)  |
| EPI-T   | 1.4<br>(0.1–7.0)  | 0.7<br>(0.0–1.8)   | 1.4***<br>(0.1–4.9)  | 2.7<br>(0.8–6.2)   | 3.4***<br>(1.1–6.0) | 4.0***<br>(1.2–8.1) | 4.9***<br>(1.9–8.9) | 9.3***<br>(2.5–15.3) | 19.3<br>(11.8–58.3) | 38.2***<br>(20.5–57.1) | 10.4*<br>(5.0–19.8) |
| EPI-NT  | 1.2<br>(0.5–2.3)  | 0.4**<br>(0.2–0.9) | 0.58***<br>(0.3–2.0) | 1.2**<br>(1.0–3.1) | 1.9***<br>(1.0–3.2) | 2.3***<br>(1.1–3.7) | 2.5***<br>(1.3–5.1) | 5.1***<br>(9.9–24.0) | 17.7<br>(9.9–24.0)  | 51.5***<br>(36.9–58.7) | 16.3*<br>(8.1–21.2) |

AUC% = a fraction of overall area under the curve; EPI = exocrine pancreatic insufficiency; EPI-NT = EPI untreated; EPI-T = EPI treated with enzyme supplementation. Range in parentheses.

\* Significantly different between all 3 groups.

\*\* Significantly different between groups.

\*\*\* Significantly different between groups.
